# Supplementary material
Source: PubMed Central journal article supplement (PMC6657390)
Supplement: kxy061_supp.pdf [file kxy061_supp.pdf]

# Supplementary Materials for Response to Guo et al.’s Letter to the Editor

Youyi Fong, Ying Huang, Maria Lemos, Julie McElrath

## A Estimated size

Because MW-MW<sub>2</sub> and SR-MW<sub>2</sub> only make comparisons within the paired subset and the unpaired subset, it is possible to perform permutation tests to obtain p-values. This is especially beneficial for MW-MW<sub>2</sub> because the variance of the Wilcoxon-Mann-Whitney statistic for paired data is not distribution-free and the need to estimate its variance under small sample sizes may lead to inflated Type 1 error rates. For example, Table 1 of Guo *and others* (2018) shows that the estimated size of MW-MW<sub>2</sub> is 0.068 when  $m = 20, l = 5, n = 10, \rho = 0.8$ , where  $m, l, n$  refer to the number of pairs, the number of independent  $x$ ’s, the number of independent  $y$ ’s, and  $\rho$  is the correlation between the two samples. Although using more complicated variance estimators (Fong *and others*, 2018, Section 2.1.2) can lead to smaller inflation (Table A.1-A.4), it is still better to use permutation-based methods to estimate p-values. To obtain permutation-based reference distributions for MW-MW<sub>2</sub>, we independently permute the paired subset and the unpaired subset, thereby allowing us to preserve the pairing structure in the paired subset. We will refer to this variant of MW-MW<sub>2</sub> as MW-MW<sub>2</sub><sup>perm</sup>. Table A.1-A.4 in the supplementary materials show that the Type 1 error rates of MW-MW<sub>2</sub><sup>perm</sup> are very close to the nominal value.

| $(l, n)$ | MW-MW <sub>0</sub> <sup>l</sup> |     |     | MW-MW <sub>2</sub> <sup>perm</sup> |     |     | MW-MW <sub>2</sub> |     |     | SR-MW <sub>2</sub> |     |     | SR-MW <sub>0</sub> <sup>l</sup> |     |     |
|----------|---------------------------------|-----|-----|------------------------------------|-----|-----|--------------------|-----|-----|--------------------|-----|-----|---------------------------------|-----|-----|
|          | 0                               | 0.5 | 0.8 | 0                                  | 0.5 | 0.8 | 0                  | 0.5 | 0.8 | 0                  | 0.5 | 0.8 | 0                               | 0.5 | 0.8 |
| (10,5)   | 5.9                             | 5.3 | 5.1 | 5.1                                | 5.0 | 4.9 | 6.0                | 5.5 | 5.1 | 5.0                | 5.0 | 5.1 | 5.6                             | 5.3 | 4.9 |
| (10,10)  | 5.5                             | 5.3 | 5.0 | 4.7                                | 4.8 | 4.8 | 5.8                | 5.4 | 5.0 | 4.9                | 4.7 | 4.8 | 5.2                             | 5.0 | 5.0 |
| (40,5)   | 5.3                             | 5.0 | 5.1 | 4.8                                | 4.9 | 5.0 | 5.8                | 5.4 | 5.1 | 4.8                | 4.9 | 5.0 | 5.2                             | 4.9 | 4.9 |

Table A.1: Estimated size, normal distribution,  $m = 20$ .

| $(l, n)$ | MW-MW <sub>0</sub> <sup>l</sup> |     |     | MW-MW <sub>2</sub> <sup>perm</sup> |     |     | MW-MW <sub>2</sub> |     |     | SR-MW <sub>2</sub> |     |     | SR-MW <sub>0</sub> <sup>l</sup> |     |     |
|----------|---------------------------------|-----|-----|------------------------------------|-----|-----|--------------------|-----|-----|--------------------|-----|-----|---------------------------------|-----|-----|
|          | 0                               | 0.5 | 0.8 | 0                                  | 0.5 | 0.8 | 0                  | 0.5 | 0.8 | 0                  | 0.5 | 0.8 | 0                               | 0.5 | 0.8 |
| (10,5)   | 5.7                             | 5.1 | 5.1 | 5.0                                | 4.9 | 4.9 | 6.2                | 5.7 | 5.1 | 4.9                | 4.9 | 4.9 | 5.3                             | 5.1 | 5.0 |
| (10,10)  | 5.9                             | 5.3 | 5.0 | 5.3                                | 5.0 | 4.8 | 6.6                | 5.7 | 5.0 | 5.5                | 5.1 | 4.9 | 5.7                             | 5.3 | 5.0 |
| (40,5)   | 5.6                             | 5.3 | 5.1 | 5.3                                | 5.0 | 5.0 | 6.2                | 5.4 | 5.1 | 5.0                | 5.0 | 4.9 | 5.4                             | 5.2 | 4.9 |

Table A.2: Estimated size, logistic distribution,  $m = 20$ .

| $(l, n)$ | MW-MW <sub>0</sub> <sup>l</sup> |     |     | MW-MW <sub>2</sub> <sup>perm</sup> |     |     | MW-MW <sub>2</sub> |     |     | SR-MW <sub>2</sub> |     |     | SR-MW <sub>0</sub> <sup>l</sup> |     |     |
|----------|---------------------------------|-----|-----|------------------------------------|-----|-----|--------------------|-----|-----|--------------------|-----|-----|---------------------------------|-----|-----|
|          | 0                               | 0.5 | 0.8 | 0                                  | 0.5 | 0.8 | 0                  | 0.5 | 0.8 | 0                  | 0.5 | 0.8 | 0                               | 0.5 | 0.8 |
| (10,5)   | 5.9                             | 5.3 | 5.1 | 5.1                                | 5.0 | 4.9 | 6.0                | 5.5 | 5.1 | 5.0                | 5.0 | 5.1 | 5.6                             | 5.3 | 5.1 |
| (10,10)  | 5.5                             | 5.3 | 5.0 | 4.7                                | 4.8 | 4.8 | 5.8                | 5.4 | 5.0 | 5.0                | 5.0 | 4.9 | 5.2                             | 5.1 | 5.1 |
| (40,5)   | 5.3                             | 5.0 | 5.1 | 4.8                                | 4.9 | 5.0 | 5.8                | 5.4 | 5.1 | 4.7                | 4.8 | 4.8 | 5.3                             | 5.0 | 4.7 |

Table A.3: Estimated size, gamma distribution,  $m = 20$ .

| $(l, n)$ | MW-MW <sub>0</sub> <sup>l</sup> |     |     | MW-MW <sub>2</sub> <sup>perm</sup> |     |     | MW-MW <sub>2</sub> |     |     | SR-MW <sub>2</sub> |     |     | SR-MW <sub>0</sub> <sup>l</sup> |     |     |
|----------|---------------------------------|-----|-----|------------------------------------|-----|-----|--------------------|-----|-----|--------------------|-----|-----|---------------------------------|-----|-----|
|          | 0                               | 0.5 | 0.8 | 0                                  | 0.5 | 0.8 | 0                  | 0.5 | 0.8 | 0                  | 0.5 | 0.8 | 0                               | 0.5 | 0.8 |
| (10,5)   | 5.9                             | 5.3 | 5.0 | 5.1                                | 4.9 | 4.9 | 6.0                | 5.3 | 4.9 | 5.0                | 4.9 | 5.0 | 5.5                             | 5.2 | 5.1 |
| (10,10)  | 5.5                             | 5.1 | 5.2 | 4.7                                | 4.8 | 4.7 | 5.8                | 5.4 | 5.0 | 4.8                | 5.0 | 5.1 | 5.3                             | 4.9 | 5.1 |
| (40,5)   | 5.3                             | 5.0 | 5.1 | 4.8                                | 4.9 | 4.9 | 5.8                | 5.1 | 4.9 | 4.5                | 4.6 | 4.7 | 5.2                             | 5.0 | 4.8 |

Table A.4: Estimated size, lognormal distribution,  $m = 20$ .

## B Power comparison under logistic, gamma and lognormal distributions

| $(l, n)$ | MW-MW <sub>0</sub> <sup>l</sup> |     |     | MW-MW <sub>2</sub> <sup>perm</sup> |     |     | SR |     |     | SR-MW <sub>2</sub> |     |     | SR-MW <sub>0</sub> <sup>l</sup> |     |     |
|----------|---------------------------------|-----|-----|------------------------------------|-----|-----|----|-----|-----|--------------------|-----|-----|---------------------------------|-----|-----|
|          | 0                               | 0.5 | 0.8 | 0                                  | 0.5 | 0.8 | 0  | 0.5 | 0.8 | 0                  | 0.5 | 0.8 | 0                               | 0.5 | 0.8 |
| (10,5)   | 24                              | 34  | 57  | 23                                 | 35  | 62  | 17 | 31  | 60  | 22                 | 36  | 61  | 24                              | 35  | 54  |
| (10,10)  | 27                              | 37  | 59  | 25                                 | 37  | 63  | 18 | 31  | 60  | 25                 | 38  | 63  | 26                              | 38  | 56  |
| (40,5)   | 30                              | 41  | 64  | 25                                 | 37  | 64  | 17 | 31  | 60  | 24                 | 38  | 63  | 30                              | 42  | 62  |

Table B.1: Estimated power, logistic distribution,  $m = 20$ .

| $(l, n)$ | MW-MW <sub>0</sub> <sup>l</sup> |     |     | MW-MW <sub>2</sub> <sup>perm</sup> |     |     | SR |     |     | SR-MW <sub>2</sub> |     |     | SR-MW <sub>0</sub> <sup>l</sup> |     |     |
|----------|---------------------------------|-----|-----|------------------------------------|-----|-----|----|-----|-----|--------------------|-----|-----|---------------------------------|-----|-----|
|          | 0                               | 0.5 | 0.8 | 0                                  | 0.5 | 0.8 | 0  | 0.5 | 0.8 | 0                  | 0.5 | 0.8 | 0                               | 0.5 | 0.8 |
| (10,5)   | 14                              | 18  | 32  | 13                                 | 18  | 35  | 9  | 15  | 31  | 12                 | 17  | 33  | 13                              | 18  | 29  |
| (10,10)  | 15                              | 19  | 34  | 13                                 | 19  | 35  | 9  | 15  | 31  | 13                 | 18  | 34  | 14                              | 18  | 30  |
| (40,5)   | 16                              | 21  | 35  | 14                                 | 19  | 35  | 9  | 15  | 31  | 12                 | 18  | 33  | 16                              | 21  | 33  |

Table B.2: Estimated power, gamma distribution,  $m = 20$ .

| $(l, n)$ | MW-MW <sub>0</sub> <sup>l</sup> |     |     | MW-MW <sub>2</sub> <sup>perm</sup> |     |     | SR |     |     | SR-MW <sub>2</sub> |     |     | SR-MW <sub>0</sub> <sup>l</sup> |     |     |
|----------|---------------------------------|-----|-----|------------------------------------|-----|-----|----|-----|-----|--------------------|-----|-----|---------------------------------|-----|-----|
|          | 0                               | 0.5 | 0.8 | 0                                  | 0.5 | 0.8 | 0  | 0.5 | 0.8 | 0                  | 0.5 | 0.8 | 0                               | 0.5 | 0.8 |
| (10,5)   | 25                              | 39  | 64  | 23                                 | 40  | 68  | 12 | 23  | 47  | 16                 | 29  | 51  | 21                              | 32  | 50  |
| (10,10)  | 28                              | 41  | 65  | 25                                 | 42  | 69  | 12 | 23  | 47  | 19                 | 31  | 53  | 24                              | 35  | 51  |
| (40,5)   | 31                              | 46  | 71  | 25                                 | 42  | 70  | 12 | 23  | 47  | 17                 | 30  | 53  | 27                              | 41  | 62  |

Table B.3: Estimated power, lognormal distribution,  $m = 20$ .

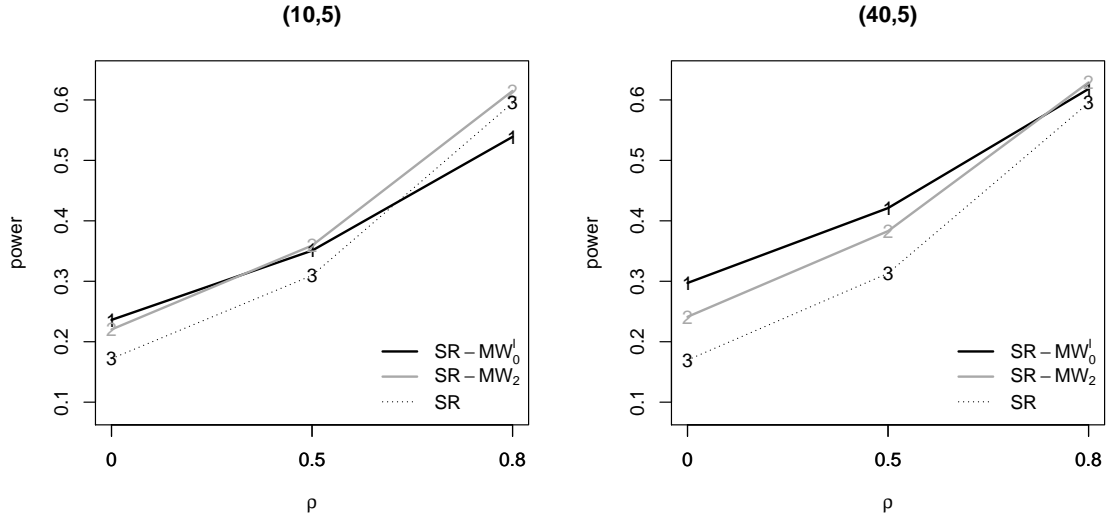

(a) Comparison between SR-MW<sub>0</sub><sup>l</sup>, SR-MW<sub>2</sub> and SR.

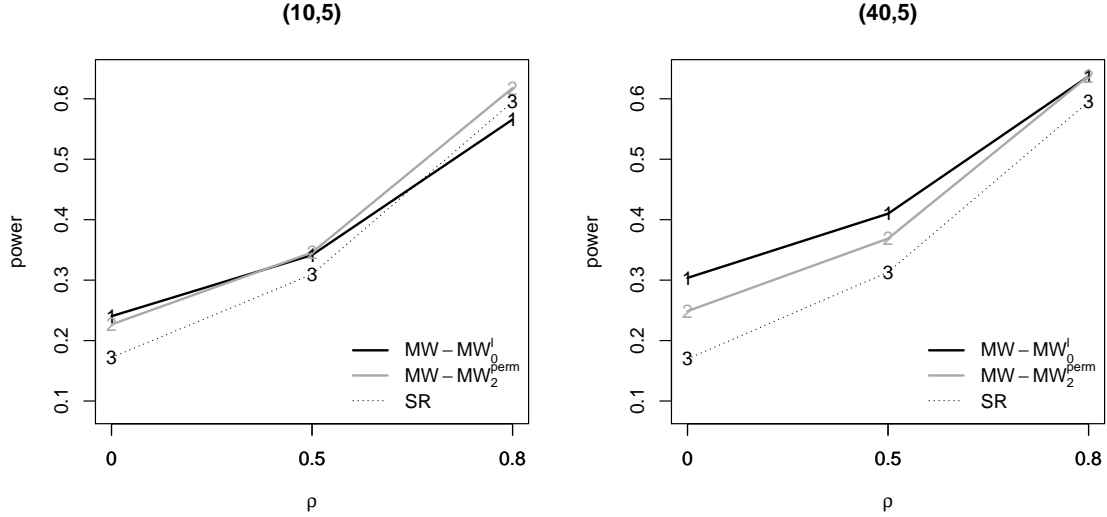

(b) Comparison between MW-MW<sub>0</sub><sup>l</sup>, MW-MW<sub>2</sub><sup>perm</sup> and SR.

Figure B.1: Power comparison when the marginal distribution is logistic. The number of paired observations,  $m$ , is 20 pairs, the numbers of unpaired data,  $(l, n)$ , are given in the titles.

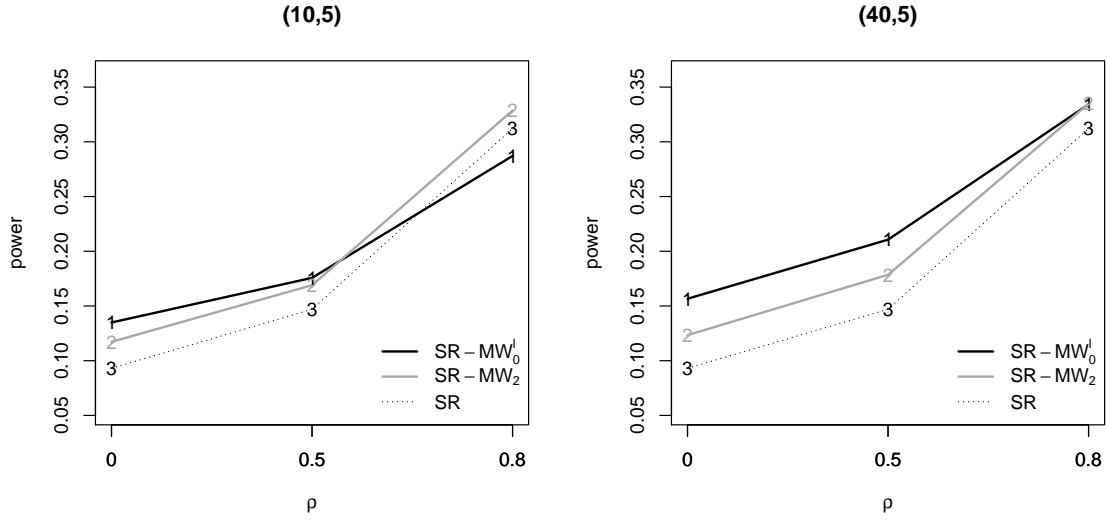

(a) Comparison between  $SR-MW_0^l$ ,  $SR-MW_2$  and  $SR$ .

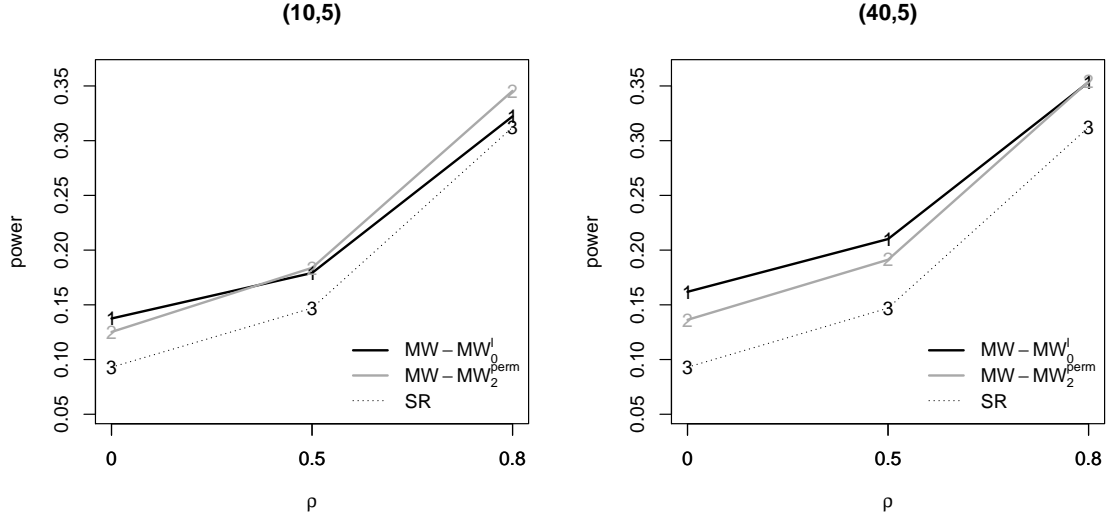

(b) Comparison between  $MW-MW_0^l$ ,  $MW-MW_2$  and  $SR$ .

Figure B.2: Power comparison when the marginal distribution is gamma. The number of paired observations,  $m$ , is 20 pairs, the numbers of unpaired data,  $(l, n)$ , are given in the titles.

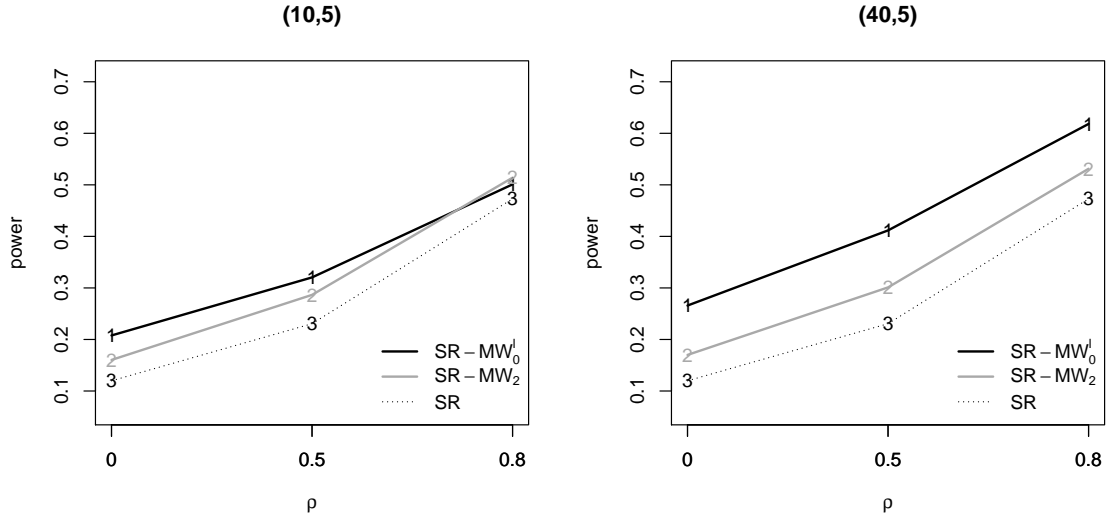

(a) Comparison between SR-MW<sub>0</sub><sup>l</sup>, SR-MW<sub>2</sub> and SR.

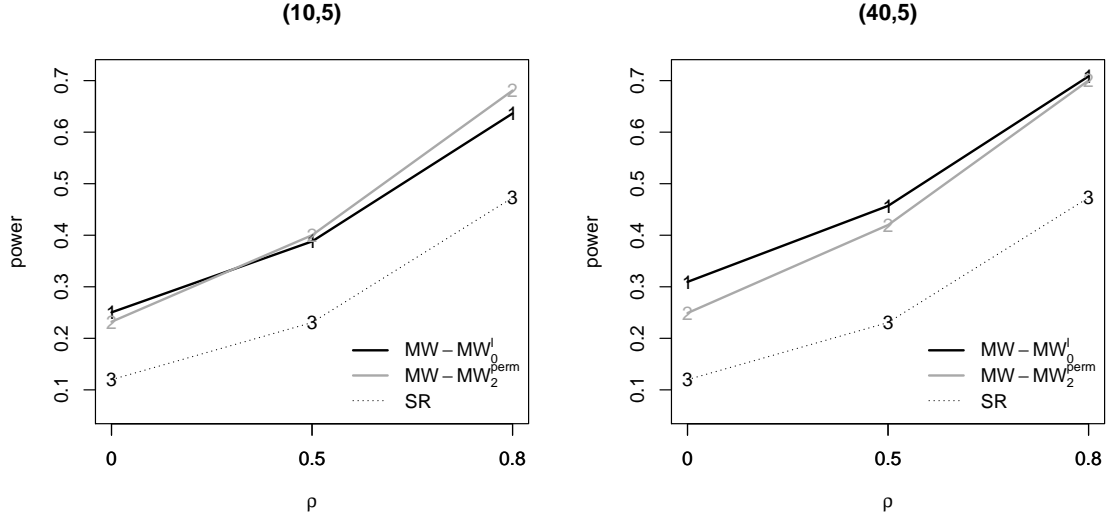

(b) Comparison between MW-MW<sub>0</sub><sup>l</sup>, MW-MW<sub>2</sub><sup>perm</sup> and SR.

Figure B.3: Power comparison when the marginal distribution is lognormal. Sample sizes:  $m = 20$  and  $(l, n)$  are given in the titles.

## C Comparison of tests when all data are paired

| $\rho$ | 0    | 0.5  | 0.8  |
|--------|------|------|------|
| MW     | 0.18 | 0.36 | 0.66 |
| SR     | 0.12 | 0.23 | 0.47 |

Table C.1: Estimated power, lognormal distribution. Paired data only,  $m = 20$ . For MW, p values are obtained from permutation-based reference distributions.

| $\rho$ | 0    | 0.5  | 0.8  |
|--------|------|------|------|
| MW     | 0.14 | 0.23 | 0.47 |
| SR     | 0.14 | 0.23 | 0.51 |

Table C.2: Estimated power, normal distribution. Paired data only,  $m = 20$ . For MW, p values are obtained from permutation-based reference distributions.

## D Comparison of tests when there are only unpaired observations from one sample

| $(l, n)$ | MW-MW $_0^l$ |     |     | SR |     |     | SR-MW $_0^l$ |     |     |
|----------|--------------|-----|-----|----|-----|-----|--------------|-----|-----|
|          | 0            | 0.5 | 0.8 | 0  | 0.5 | 0.8 | 0            | 0.5 | 0.8 |
| (10,0)   | 18           | 26  | 48  | 14 | 23  | 51  | 16           | 21  | 32  |
| (40,0)   | 21           | 29  | 50  | 14 | 23  | 51  | 20           | 29  | 46  |

Table D.1: Estimated power, normal distribution,  $m = 20$ .

| $(l, n)$ | MW-MW $_0^l$ |     |     | SR |     |     | SR-MW $_0^l$ |     |     |
|----------|--------------|-----|-----|----|-----|-----|--------------|-----|-----|
|          | 0            | 0.5 | 0.8 | 0  | 0.5 | 0.8 | 0            | 0.5 | 0.8 |
| (10,0)   | 23           | 34  | 59  | 17 | 31  | 60  | 19           | 26  | 39  |
| (40,0)   | 27           | 37  | 62  | 17 | 31  | 60  | 26           | 37  | 56  |

Table D.2: Estimated power, logistic distribution,  $m = 20$ .

| $(l, n)$ | MW-MW $_0^l$ |     |     | SR |     |     | SR-MW $_0^l$ |     |     |
|----------|--------------|-----|-----|----|-----|-----|--------------|-----|-----|
|          | 0            | 0.5 | 0.8 | 0  | 0.5 | 0.8 | 0            | 0.5 | 0.8 |
| (10,0)   | 13           | 18  | 33  | 9  | 15  | 31  | 11           | 14  | 21  |
| (40,0)   | 15           | 20  | 35  | 9  | 15  | 31  | 13           | 18  | 30  |

Table D.3: Estimated power, gamma distribution,  $m = 20$ .

| $(l, n)$ | MW-MW $_0^l$ |     |     | SR-MW $_0^l$ |     |     |
|----------|--------------|-----|-----|--------------|-----|-----|
|          | 0            | 0.5 | 0.8 | 0            | 0.5 | 0.8 |
| (10,0)   | 5.8          | 5.5 | 5.0 | 5.1          | 5.1 | 5.1 |
| (40,0)   | 5.4          | 5.1 | 5.1 | 5.0          | 5.0 | 5.1 |

Table D.4: Estimated size, normal distribution,  $m = 20$ .

| $(l, n)$ | MW-MW $_0^l$ |     |     | SR-MW $_0^l$ |     |     |
|----------|--------------|-----|-----|--------------|-----|-----|
|          | 0            | 0.5 | 0.8 | 0            | 0.5 | 0.8 |
| (10,0)   | 5.7          | 5.6 | 5.0 | 4.9          | 4.8 | 5.1 |
| (40,0)   | 5.7          | 5.1 | 5.1 | 5.2          | 5.0 | 5.1 |

Table D.5: Estimated size, logistic distribution,  $m = 20$ .

| $(l, n)$ | MW-MW $_0^l$ |     |     | SR-MW $_0^l$ |     |     |
|----------|--------------|-----|-----|--------------|-----|-----|
|          | 0            | 0.5 | 0.8 | 0            | 0.5 | 0.8 |
| (10,0)   | 5.8          | 5.5 | 5.0 | 5.0          | 5.1 | 5.2 |
| (40,0)   | 5.4          | 5.1 | 5.1 | 5.1          | 5.1 | 5.1 |

Table D.6: Estimated size, gamma distribution,  $m = 20$ .



## References

- FONG, YOUYI, HUANG, YING, LEMOS, MARIA P, & MCELRATH, M JULIANA. (2018). Rank-based two-sample tests for paired data with missing values. *Biostatistics*, **19**, 281–294.
- GUO, XU, GAO, YUJING, NIU, CUIZHEN, & ZHANG, SHUMEI. (2018). Letter to the editor. *Biostatistics*, kxy047.
